# Supplementary material
Source: PubMed Central journal article supplement (PMC3080997)
Supplement: 1016072108_pnas.1016072108_SI.pdf [file 1016072108_pnas.1016072108_SI.pdf]

# Supporting Information

Rossi et al. 10.1073/pnas.1016072108

## SI Text

**SI Materials and Methods. Restriction endonuclease protection assay on oligonucleotide substrates.** The RecA protection assay was performed by incubating RecA (1  $\mu$ M) with  $^{32}$ P-labeled tailed DNA (A4 or A5) (33 nM) in buffer containing 35 mM Tris HCl, pH 7.5, 15 mM MgCl<sub>2</sub>, 2 mM DTT, 3 mM ATP, and 100  $\mu$ g/mL BSA for 2 min at 37 °C. The RecA filament was then “frozen” by the addition of 10  $\mu$ M ATP $\gamma$ S and incubated for an additional 2 min at 37 °C. Digestion was initiated by the addition of BamHI (0.5 U/ $\mu$ L) and incubated for 20 min at 37 °C. The samples were deproteinized by treatment with 1.6 mg/mL proteinase K, 0.8% SDS, 6% glycerol, 0.01% bromphenol blue and analyzed in 10% (17:1) polyacrylamide gels.

The RAD51 protection assay was performed by incubating RAD51 (1.5  $\mu$ M) with  $^{32}$ P-labeled tailed DNA (A4 or A5) (33 nM) in buffer containing 25 mM Tris-acetate (pH 7.5), 10 mM magnesium acetate, 2 mM DTT, 200 mM NaCl, 2 mM ATP, 15 mM phosphocreatine, 10 units/mL creatine phosphokinase, and 100  $\mu$ g/mL BSA for 10 min at 37 °C. Digestion was initiated by the addition of BamHI (1.5 U/ $\mu$ L) and incubated for 30 min at 37 °C. The samples were deproteinized by treatment with 1.6 mg/mL proteinase K, 0.8% SDS, 6% glycerol, 0.01% bromphenol blue and analyzed in 10% (17:1) polyacrylamide gels.

**DNA strand-exchange assay with oligonucleotide-based substrates.** The nucleoprotein filaments were formed by incubating RecA (2  $\mu$ M) with  $^{32}$ P-labeled ssDNA (A7) (6  $\mu$ M, nucleotides) in buffer containing 35 mM Tris-HCl, pH 7.5, 15 mM MgCl<sub>2</sub>, 2 mM DTT, 3 mM ATP, 10 mM creatine phosphate, 10 units/mL creatine phosphokinase, and 100  $\mu$ g/mL BSA for 10 min at 37 °C. The reactions were initiated by the addition of complementary dsDNA (B6) (2  $\mu$ M, base pairs). Aliquots were withdrawn from the reaction mixture at the indicated time points and deproteinized by treatment with 0.96 mg/mL proteinase K, 1.4% SDS, 7.5% glycerol, 0.015% bromphenol blue for 5 min at 22 °C. The DNA products were analyzed by electrophoresis in 10% polyacrylamide gels (17:1) in 1X TBE buffer (89 mM Tris-borate, pH 8.3, and 1 mM EDTA).

**Branch migration (BM) assay on oligonucleotide-based substrates.** The assay was performed as described in main text. The DNA products were analyzed by electrophoresis 10% polyacrylamide gels (29:1) in 1X TBE buffer (89 mM Tris-borate, pH 8.3, and 1 mM EDTA) at 4 °C. Gels were dried on DE81 chromatography paper (Whatman) and quantified using a Storm 840 PhosphorImager (Amersham Biosciences).

**Spectrophotometric assay to measure the RecA ATPase.** RecA was incubated with 5'-tail HJs (B5, 7.5  $\mu$ M base pairs) in buffer containing 35 mM Tris-HCl, pH 7.5, 3 mM MgCl<sub>2</sub>, 1 mM DTT, 3 mM ATP, 3 mM phosphoenolpyruvate, pyruvate kinase (20 units/mL), lactate dehydrogenase (20 units/mL), and NADH (200  $\mu$ g/mL) at 37 °C. The oxidation of NADH, coupled to ADP phosphorylation, resulted in a decrease in absorbance at 340 nm, which was continuously monitored by a Hewlett-Packard 8453 diode array spectrophotometer using UV-Visible ChemStation software. The rate of ATP hydrolysis was calculated from the rate of change in absorbance using the following formula: rate of ATP hydrolysis ( $\mu$ M/min) = rate of  $A_{340}$  decrease ( $s^{-1}$ )  $\times$  9,880.

**Measuring of the RAD51 ATPase by TLC.** Reactions were carried out in buffer containing 25 mM Tris acetate (pH 7.5), 2 mM ATP, 1  $\mu$ Ci [ $\gamma$ - $^{32}$ P] ATP, 50  $\mu$ M [nt (nucleotides)] DNA (circular  $\phi$ X174 ssDNA or supercoiled  $\phi$ X174 DNA), 2 mM DTT, 10 mM magnesium acetate, and RAD51 (5  $\mu$ M) for 2 h at 37 °C. The extent of ATP hydrolysis was determined by thin layer chromatography (TLC) on PEI-cellulose plates in 1 M formic acid with 0.5 M LiCl, and the products were quantified by using a Storm 840 PhosphorImager (Molecular Dynamics).

**BM on plasmid-based DNA substrates by RecA.** RecA nucleoprotein filaments were assembled by incubation of RecA protein (4  $\mu$ M) with gapped pBSK(+) DNA (20  $\mu$ M, nucleotides) in buffer containing 35 mM Tris-HCl, pH 7.5, 15 mM MgCl<sub>2</sub>, 2 mM DTT, 3 mM ATP, 10 mM phosphocreatine, 10 units/mL creatine phosphokinase, and 100  $\mu$ g/mL BSA for 5 min at 37 °C. SSB (ssDNA-binding protein) (0.33  $\mu$ M) was added to the nucleoprotein filaments and incubation was continued for another 1 min. DNA exchange reactions were initiated by the addition of homologous dsDNA (20  $\mu$ M, nucleotides) to the nucleoprotein filaments. After 10 min, the reaction was stopped to produce deproteinized joint molecule (JMs) by addition of proteinase K to 1.6 mg/mL and SDS to 0.8%, followed by incubation for a further 15 min at 37 °C.

Deproteinized JMs were supplemented with EDTA to 2 mM and passed twice through S-400 Spin columns (GE Healthcare) equilibrated with 30 mM Tris-HCl, pH 7.5 (1, 2). After addition of MgCl<sub>2</sub> to 10 mM the JMs were kept at -20 °C. BM of deproteinized JM (0.32 nM, molecules) was carried out in buffer containing 30 mM Tris-HCl, pH 7.5, 10 mM MgCl<sub>2</sub>, 2 mM DTT, 2 mM ATP, 10 mM phosphocreatine, and 10 units/mL creatine phosphokinase at 37 °C. RecA (4  $\mu$ M) was added to the reaction mixtures. When indicated, SSB (0.4  $\mu$ M or 55 nM) was added to the reaction. The reaction mixtures were incubated for the indicated periods of time. The samples were analyzed as described for RAD51 reaction.

**BM on plasmid-based DNA substrates by RAD51.** Nucleoprotein filaments were formed by incubating RAD51 protein (5  $\mu$ M) with pBSK(+) gapped DNA (20  $\mu$ M, nt) (4-stranded reaction) in buffer containing 25 mM Tris acetate, pH 7.5, 2 mM ATP, 275 mM NaCl, 1 mM MgCl<sub>2</sub>, 1 mM CaCl<sub>2</sub>, 1 mM DTT, and 100  $\mu$ g/mL BSA for 10 min 37 °C. RPA (Replication protein A) (0.4  $\mu$ M) was added to the nucleoprotein filaments followed by a 10-min incubation. DNA strand-exchange reaction was initiated by addition of 5'-labeled linear pBSK(+) dsDNA (20  $\mu$ M, nt). BM of nondeproteinized JMs ( $\sigma$  and  $\alpha$ -structures) was initiated by Ca<sup>2+</sup> depletion with 1.2 mM EGTA.

BM of deproteinized JMs (0.32 nM, molecules) was carried out in buffer containing 30 mM Tris-HCl, pH 7.5, 10 mM MgCl<sub>2</sub>, 350 mM NaCl, 2 mM DTT, 2 mM ATP, 8 mM phosphocreatine, and 8 units/mL creatine phosphokinase at 37 °C. RAD51 (10  $\mu$ M) was added to the reaction mixtures. When indicated, RPA (0.4  $\mu$ M or 55 nM) was added to the reaction. The DNA products were deproteinized by treatment with stop buffer for 15 min at 37 °C and analyzed in 1.5% agarose gels in 1X TAE buffer (40 mM Tris-acetate, pH 8.0 and 1 mM EDTA).

**Digestion of the displaced ssDNA of JMs with an ssDNA-specific nucleases.** To remove 5'-ssDNA tail from JMs made by RecA,  $^{32}$ P-labeled JMs were treated with Exonuclease VII (0.03 U/ $\mu$ L) in buffer containing 35 mM Tris-HCl, pH 7.5, 15 mM MgCl<sub>2</sub>, 2 mM





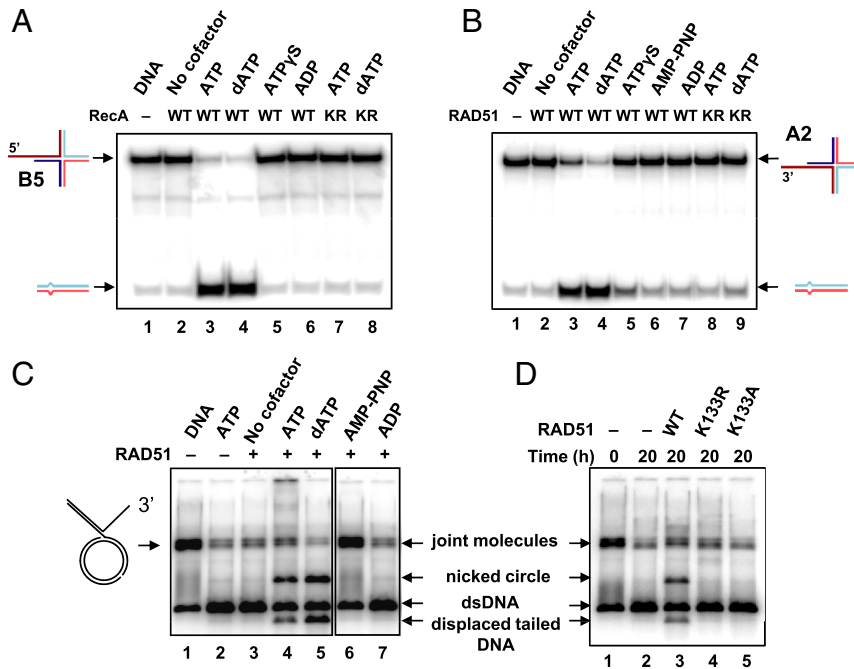

**Fig. S3.** BM by RecA/RAD51 requires ATP or dATP hydrolysis. (A) Effect of nucleotide cofactors on BM by RecA. RecA (3  $\mu$ M) was incubated with 5'-tail HJs (B1; 32 nM) for 45 min in the presence of 3 mM ATP (lane 3), dATP (lane 4), ATP $\gamma$ S (lane 5), ADP (lane 6), or in the absence of a nucleotide cofactor (lane 2). RecA-independent BM in the presence of 3 mM ATP after a 45 min incubation is shown in lane 1. Wild type RecA was replaced with the ATPase-deficient K72R mutant (3  $\mu$ M) in lanes 7 and 8. (B) Effect of nucleotide cofactors on BM by RAD51. RAD51 (2.6  $\mu$ M) was incubated with 3'-tail HJs (A2; 32 nM) for 45 min in the presence of 2 mM ATP (lane 3), dATP (lane 4), ATP $\gamma$ S (lane 5), AMP-PNP (lane 6), ADP (lane 7), or in the absence of a nucleotide cofactor (lane 2). RAD51-independent BM in the presence of 2 mM ATP after a 45 min incubation is shown in lane 1. BM of the ATPase-deficient K133R mutant (2.6  $\mu$ M) was analyzed in the presence of 2 mM ATP or dATP (lanes 8 and 9, respectively). The ATP regeneration system was included only in the reactions containing ATP and dATP. (C) BM by RAD51 on plasmid-based DNA substrates requires ATP or dATP hydrolysis. RAD51 (10  $\mu$ M) was incubated with deproteinized JMs (0.32 nM) (lane 1) for 20 h in the presence of 2 mM ATP (lane 4), dATP (lane 5), AMP-PNP (lane 6) or ADP (lane 7), or in the absence of a nucleotide cofactor (lane 3). Protein-free BM in the presence of 2 mM ATP after 20 h of incubation is shown in lane 2. (D) The RAD51 ATPase mutants do not promote BM. Wild type RAD51 (10  $\mu$ M) (lane 3) or its ATPase mutants K133R (lane 4) and K133A (lane 5) were incubated with deproteinized JMs (0.32 nM) (lane 1) for 20 h in the presence of 2 mM ATP. Spontaneous BM in the presence of ATP after 20 h of incubation is shown in lane 2. Note, loss of JMs observed in the presence of inactive RAD51 or in the absence of RAD51 is due to spontaneous BM.













Table S1. Oligonucleotide Substrates used in this study

Substrate structures \*

**RecA/RAD51 Substrates**

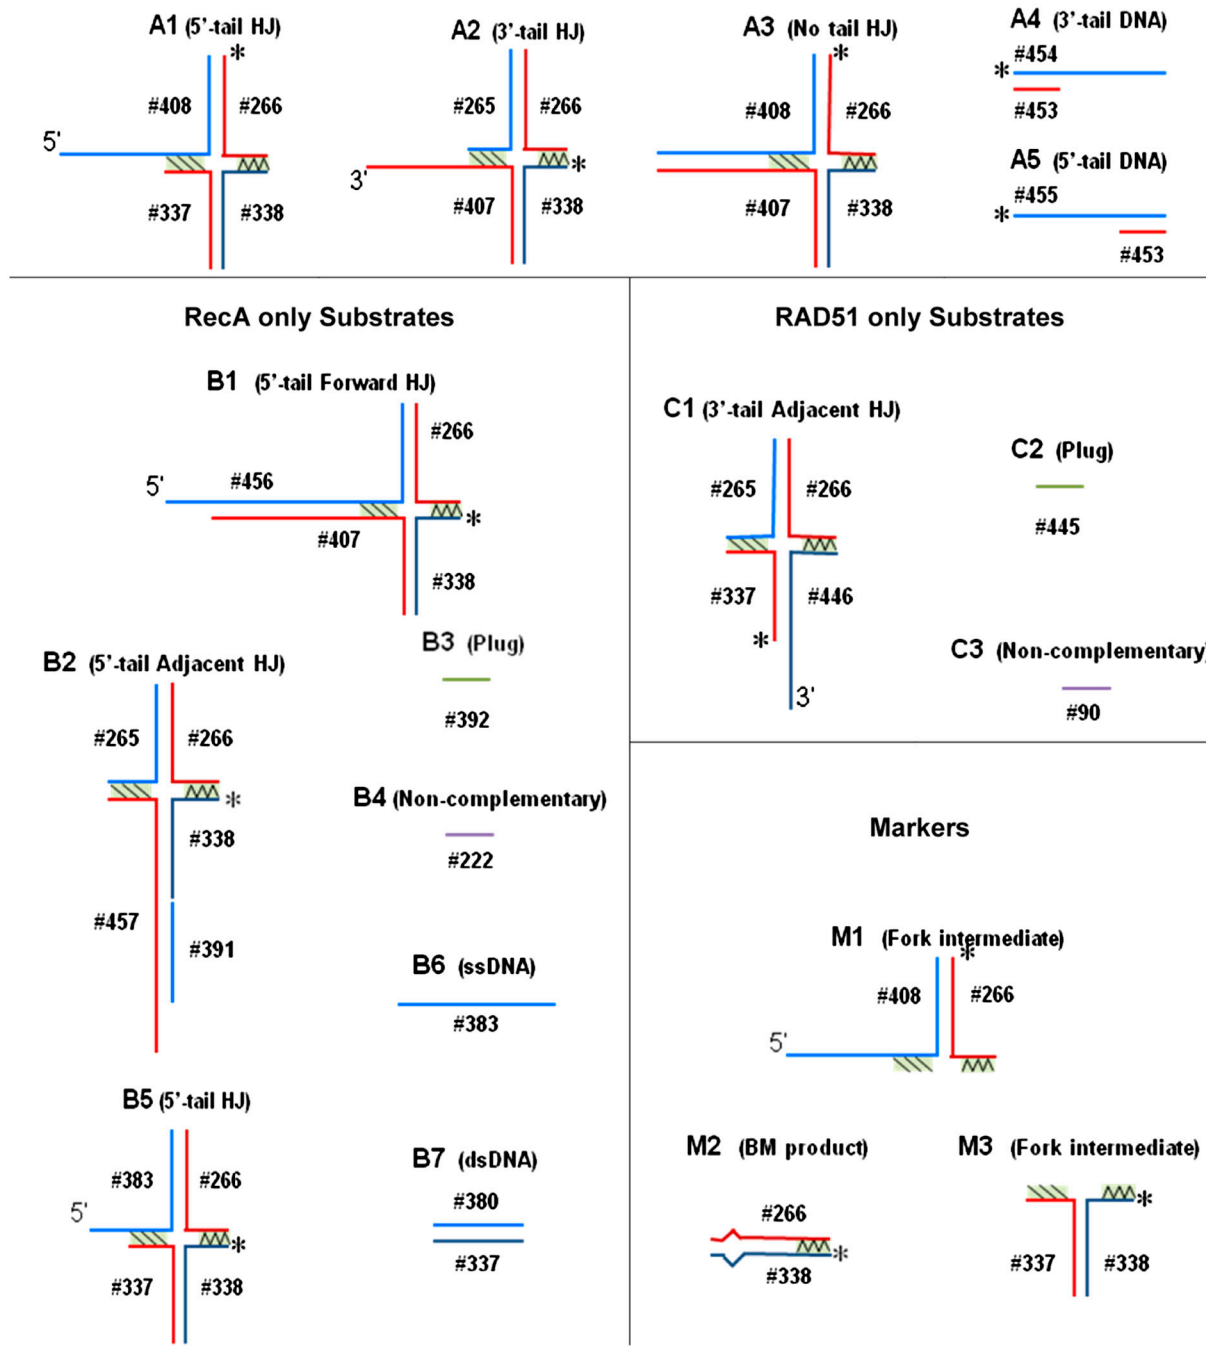



**Table S2. BM rates on plasmid-based Holliday Junction substrates**

| BM rate                                     | References          |
|---------------------------------------------|---------------------|
| <b>RuvAB</b>                                |                     |
| <i>Biochemical (bulk) BM assays</i> *       |                     |
| 10–20 bp/s                                  | (1)                 |
| 34 bp/s †                                   | (2)                 |
| <i>Single molecule method</i>               |                     |
| 49 ± 1.5 bp/s                               | (3), corrected (10) |
| 43 ± 4.3 bp/s                               | (4)                 |
| <b>RecA (Biochemical BM assay) *</b>        |                     |
| 3 ± 4 bp/s                                  | (5, 6)              |
| 3.4 bp/s †                                  | this study          |
| <b>RecG (Biochemical BM assay)*</b>         |                     |
| 8 ± 40 bp/s †                               | (7)                 |
| <b>Human RAD54 (Biochemical BM assay) *</b> |                     |
| 34 bp/s †                                   | (8)                 |
| <b>Human RAD51 (Biochemical BM assay) *</b> |                     |
| 0.3 bp/s †                                  | this study          |

\*The rate was determined by the earliest appearance of the BM product in an agarose gel.

†245 bp/s rate of replication fork regression was reported for RecG (9).

‡The same DNA substrate were used in these experiments.

- 1 Tsaneva IR, Muller B, West SC (1992) ATP-dependent BM of Holliday junctions promoted by the RuvA and RuvB proteins of *E. coli*. *Cell* 69:1171–1180.
- 2 Mazin AV, Mazina OM, Bugreev DV, Rossi MJ (2010) Rad54, the motor of homologous recombination. *DNA Repair (Amst)* 9:286–302.
- 3 Amit R, Gileadi O, Stavans J (2004) Direct observation of RuvAB-catalyzed branch migration of single Holliday junctions. *Proc Natl Acad Sci USA* 101:11605–11610.
- 4 Dawid A, Croquette V, Grigoriev M, Heslot F (2004) Single-molecule study of RuvAB-mediated Holliday-junction migration. *Proc Natl Acad Sci USA* 101:11611–11616.
- 5 West SC, Cassuto E, Howard-Flanders P (1982) Postreplication repair in *E. coli*: strand-exchange reactions of gapped DNA by RecA protein. *Mol Gen Genet* 187:209–217.
- 6 West SC (1992) Enzymes and molecular mechanisms of genetic recombination. *Ann Rev Biochem* 61:603–640.
- 7 Whitby MC, Ryder L, Lloyd RG (1993) Reverse branch migration of Holliday junctions by RecG protein: a new mechanism for resolution of intermediates in recombination and DNA repair. *Cell* 75:341–350.
- 8 Bugreev DV, Mazina OM, Mazin AV (2006) Rad54 protein promotes branch migration of Holliday junctions. *Nature* 442:590–593.
- 9 Robu ME, Inman RB, Cox MM (2004) Situational repair of replication forks: roles of RecG and RecA proteins. *J Biol Chem* 279:10973–10981.
- 10 Corrections for Amit et al. (2006) Direct observation of RuvAB-catalyzed branch migration of single Holliday junctions. *Proc Natl Acad Sci USA* 103:12654.
